# Supplementary material
Source: PubMed Central journal article supplement (PMC1609220)
Supplement: rstb20051727s06.pdf [file rstb20051727s06.pdf]

# **ELECTRONIC APPENDIX**

This is the Electronic Appendix to the article

Critical factors for assembling a high volume of DNA barcodes

by

Mehrdad Hajibabaei\*, Jeremy R. deWaard, Natalia V. Ivanova, Sujeevan Ratnasingham, Robert T. Dooh, Stephanie L. Kirk, Paula M. Mackie and Paul D.N. Hebert

*Phil. Trans. R. Soc. B* ([doi:10.1098/rstb.2005.1727](https://doi.org/10.1098/rstb.2005.1727))

Electronic appendices are refereed with the text; however, no attempt is made to impose a uniform editorial style on the electronic appendices.

## APPENDIX 1.

### SPECIMENS AND PROTOCOLS USED IN THE EVALUATION OF DNA ISOLATION METHODS AND DIFFERENT POLYMERASES

#### A. SPECIMENS

A set of 90 samples from moth, bird and fish taxa were chosen for use in the DNA extraction method evaluation. For moths, two sets of samples were selected: a recent set consisting of samples collected 2004 and a set of archive samples that represent year-classes from 2003 to 1932. Previously frozen, ethanol fixed tissue from birds and fish was divided into six equal pieces (approximately 1-2 mm<sup>3</sup>). One leg from each moth specimen was divided into eight equal pieces (approximately 2-4 mm). Excess tissue was reserved for additional analyses if required.

---

#### Recent Moth Plate

|    | Process ID  | Voucher ID    | Collection Year | Identification         | Source              |
|----|-------------|---------------|-----------------|------------------------|---------------------|
| 1  | LCH205-04   | 04HBL003205   | 2004            | Hyles lineata          | Hebert P.D.N.- U.G. |
| 2  | LOT001-04   | 04HBL002001   | 2004            | Ceratonia undulosa     | Hebert P.D.N.- U.G. |
| 3  | LOT002-04   | 04HBL002002   | 2004            | Ceratonia undulosa     | Hebert P.D.N.- U.G. |
| 4  | LOT003-04   | 04HBL002003   | 2004            | Ceratonia undulosa     | Hebert P.D.N.- U.G. |
| 5  | LOT004-04   | 04HBL002004   | 2004            | Ceratonia undulosa     | Hebert P.D.N.- U.G. |
| 6  | LOT005-04   | 04HBL002005   | 2004            | Darapsa pholus         | Hebert P.D.N.- U.G. |
| 7  | LOT006-04   | 04HBL002006   | 2004            | Darapsa pholus         | Hebert P.D.N.- U.G. |
| 8  | LOT007-04   | 04HBL002007   | 2004            | Darapsa pholus         | Hebert P.D.N.- U.G. |
| 9  | LOT009-04   | 04HBL002009   | 2004            | Lapara bombycoides     | Hebert P.D.N.- U.G. |
| 10 | LOT010-04   | 04HBL002010   | 2004            | Lapara bombycoides     | Hebert P.D.N.- U.G. |
| 11 | LOT011-04   | 04HBL002011   | 2004            | Lapara bombycoides     | Hebert P.D.N.- U.G. |
| 12 | LOT012-04   | 04HBL002012   | 2004            | Lapara bombycoides     | Hebert P.D.N.- U.G. |
| 13 | LOT013-04   | 04HBL002013   | 2004            | Eumorpha pandorus      | Hebert P.D.N.- U.G. |
| 14 | LOT014-04   | 04HBL002014   | 2004            | Eumorpha pandorus      | Hebert P.D.N.- U.G. |
| 15 | LOT015-04   | 04HBL002015   | 2004            | Sphinx chersis         | Hebert P.D.N.- U.G. |
| 16 | Blank1      |               |                 |                        |                     |
| 17 | LOT016-04   | 04HBL002016   | 2004            | Cressonia juglandis    | Hebert P.D.N.- U.G. |
| 18 | LOT017-04   | 04HBL002017   | 2004            | Cressonia juglandis    | Hebert P.D.N.- U.G. |
| 19 | LOT018-04   | 04HBL002018   | 2004            | Cressonia juglandis    | Hebert P.D.N.- U.G. |
| 20 | LOT020-04   | 04HBL002020   | 2004            | Cressonia juglandis    | Hebert P.D.N.- U.G. |
| 21 | LOT025-04   | 04HBL002025   | 2004            | Paonias excaecatus     | Hebert P.D.N.- U.G. |
| 22 | LOT026-04   | 04HBL002026   | 2004            | Paonias excaecatus     | Hebert P.D.N.- U.G. |
| 23 | LOT028-04   | 04HBL002028   | 2004            | Paonias excaecatus     | Hebert P.D.N.- U.G. |
| 24 | LOT029-04   | 04HBL002029   | 2004            | Paonias astylus        | Hebert P.D.N.- U.G. |
| 25 | LOT030-04   | 04HBL002030   | 2004            | Paonias astylus        | Hebert P.D.N.- U.G. |
| 26 | PHMNB091-04 | 04HBL00537    | 2004            | Paonias excaecatus     | Hebert P.D.N.- U.G. |
| 27 | PHMNB092-04 | 04HBL00538    | 2004            | Sphinx kalmiae         | Hebert P.D.N.- U.G. |
| 28 | PHMNB093-04 | 04HBL00539    | 2004            | Ceratonia undulosa     | Hebert P.D.N.- U.G. |
| 29 | PHMNB094-04 | 04HBL00540    | 2004            | Smerinthus jamaicensis | Hebert P.D.N.- U.G. |
| 30 | XAB057-04   | 04HBL005057   | 2004            | Smerinthus cerisyi     | Hebert P.D.N.- U.G. |
| 31 | XAB058-04   | 04HBL005058   | 2004            | Smerinthus jamaicensis | Hebert P.D.N.- U.G. |
| 32 | Blank2      |               |                 |                        |                     |
| 33 | XAB062-04   | 04HBL005062   | 2004            | Ceratonia undulosa     | Hebert P.D.N.- U.G. |
| 34 | XAB128-04   | 04HBL005128   | 2004            | Paonias myops          | Hebert P.D.N.- U.G. |
| 35 | XAB158-04   | 04HBL005158   | 2004            | Smerinthus jamaicensis | Hebert P.D.N.- U.G. |
| 36 | XAB182-04   | 04HBL005182   | 2004            | Paonias excaecatus     | Hebert P.D.N.- U.G. |
| 37 | XAB210-04   | 04HBL005210   | 2004            | Paonias myops          | Hebert P.D.N.- U.G. |
| 38 | XAB336-04   | 04HBL005336   | 2004            | Paonias myops          | Hebert P.D.N.- U.G. |
| 39 | XAB337-04   | 04HBL005337   | 2004            | Deidamia inscripta     | Hebert P.D.N.- U.G. |
| 40 | XAB561-04   | 04HBL005561   | 2004            | Paonias myops          | Hebert P.D.N.- U.G. |
| 41 | LGSM095-04  | DNA-ATBI-0095 | 2004            | Manduca jasminearum    | Hebert P.D.N.- U.G. |
| 42 | LGSM098-04  | DNA-ATBI-0098 | 2004            | Paonias astylus        | Hebert P.D.N.- U.G. |

---

|    |             |               |      |                        |                     |
|----|-------------|---------------|------|------------------------|---------------------|
| 43 | LGSM337-04  | DNA-ATBI-0337 | 2004 | Darapsa myron          | Hebert P.D.N.- U.G. |
| 44 | LGSM338-04  | DNA-ATBI-0338 | 2004 | Manduca jasminearum    | Hebert P.D.N.- U.G. |
| 45 | LGSM340-04  | DNA-ATBI-0340 | 2004 | Dolba hyloeus          | Hebert P.D.N.- U.G. |
| 46 | LGSM341-04  | DNA-ATBI-0341 | 2004 | Sphinx eremitus        | Hebert P.D.N.- U.G. |
| 47 | LGSM342-04  | DNA-ATBI-0342 | 2004 | Darapsa pholus         | Hebert P.D.N.- U.G. |
| 48 | Blank3      |               |      |                        |                     |
| 49 | MHASC003-05 | 04-SRNP-14623 | 2004 | Xylophanes anubus      | Janzen D.H. - U.P.  |
| 50 | MHASC004-05 | 04-SRNP-14138 | 2004 | Adhemarius gannascus   | Janzen D.H. - U.P.  |
| 51 | MHASC005-05 | 04-SRNP-14175 | 2004 | Pachylia syces         | Janzen D.H. - U.P.  |
| 52 | MHASC006-05 | 04-SRNP-22447 | 2004 | Xylophanes pistacina   | Janzen D.H. - U.P.  |
| 53 | MHASC007-05 | 04-SRNP-15014 | 2004 | Perigonia ilus         | Janzen D.H. - U.P.  |
| 54 | MHASC008-05 | 04-SRNP-14620 | 2004 | Xylophanes anubus      | Janzen D.H. - U.P.  |
| 55 | MHASC009-05 | 04-SRNP-14214 | 2004 | Perigonia ilus         | Janzen D.H. - U.P.  |
| 56 | MHASC010-05 | 04-SRNP-14216 | 2004 | Nyceryx coffaeae       | Janzen D.H. - U.P.  |
| 57 | MHASC011-05 | 04-SRNP-14436 | 2004 | Nyceryx coffaeae       | Janzen D.H. - U.P.  |
| 58 | MHASC012-05 | 04-SRNP-35658 | 2004 | Nyceryx exima          | Janzen D.H. - U.P.  |
| 59 | MHASC013-05 | 04-SRNP-34629 | 2004 | Enyo ocypete           | Janzen D.H. - U.P.  |
| 60 | MHASC014-05 | 04-SRNP-55066 | 2004 | Callionima denticulata | Janzen D.H. - U.P.  |
| 61 | MHASC015-05 | 04-SRNP-47768 | 2004 | Callionima falcifera   | Janzen D.H. - U.P.  |
| 62 | MHASC016-05 | 04-SRNP-47993 | 2004 | Callionima falcifera   | Janzen D.H. - U.P.  |
| 63 | MHASC017-05 | 04-SRNP-33613 | 2004 | Xylophanes adalia      | Janzen D.H. - U.P.  |
| 64 | Blank4      |               |      |                        |                     |
| 65 | MHASC018-05 | 04-SRNP-33169 | 2004 | Xylophanes porcus      | Janzen D.H. - U.P.  |
| 66 | MHASC019-05 | 04-SRNP-33097 | 2004 | Xylophanes porcus      | Janzen D.H. - U.P.  |
| 67 | MHASC020-05 | 04-SRNP-12786 | 2004 | Manduca florestan      | Janzen D.H. - U.P.  |
| 68 | MHASC021-05 | 04-SRNP-12935 | 2004 | Manduca florestan      | Janzen D.H. - U.P.  |
| 69 | MHASC022-05 | 04-SRNP-12361 | 2004 | Manduca barnesi        | Janzen D.H. - U.P.  |
| 70 | MHASC023-05 | 04-SRNP-12358 | 2004 | Manduca barnesi        | Janzen D.H. - U.P.  |
| 71 | MHASC024-05 | 04-SRNP-12364 | 2004 | Manduca barnesi        | Janzen D.H. - U.P.  |
| 72 | MHASC025-05 | 04-SRNP-45794 | 2004 | Manduca occulta        | Janzen D.H. - U.P.  |
| 73 | MHASC026-05 | 04-SRNP-46778 | 2004 | Manduca occulta        | Janzen D.H. - U.P.  |
| 74 | MHASC027-05 | 04-SRNP-46938 | 2004 | Manduca occulta        | Janzen D.H. - U.P.  |
| 75 | MHASC028-05 | 04-SRNP-46860 | 2004 | Manduca occulta        | Janzen D.H. - U.P.  |
| 76 | MHASC029-05 | 04-SRNP-47139 | 2004 | Manduca corallina      | Janzen D.H. - U.P.  |
| 77 | MHASC030-05 | 04-SRNP-22760 | 2004 | Manduca corallina      | Janzen D.H. - U.P.  |
| 78 | MHASC031-05 | 04-SRNP-2725  | 2004 | Adhemarius ypsilon     | Janzen D.H. - U.P.  |
| 79 | MHASC032-05 | 04-SRNP-22185 | 2004 | Xylophanes tyndarus    | Janzen D.H. - U.P.  |
| 80 | Blank5      |               |      |                        |                     |
| 81 | MHASC033-05 | 04-SRNP-23883 | 2004 | Erinnyis ello          | Janzen D.H. - U.P.  |
| 82 | MHASC034-05 | 04-SRNP-22932 | 2004 | Neococytius cluentius  | Janzen D.H. - U.P.  |
| 83 | MHASC035-05 | 04-SRNP-33124 | 2004 | Oryba kadeni           | Janzen D.H. - U.P.  |
| 84 | MHASC044-05 | 04-SRNP-30968 | 2004 | Xylophanes zurcheri    | Janzen D.H. - U.P.  |
| 85 | MHASC046-05 | 04-SRNP-2515  | 2004 | Eumorpha triangulum    | Janzen D.H. - U.P.  |
| 86 | MHASC047-05 | 04-SRNP-33639 | 2004 | Xylophanes adalia      | Janzen D.H. - U.P.  |
| 87 | MHASC048-05 | 04-SRNP-22728 | 2004 | Oryba kadeni           | Janzen D.H. - U.P.  |
| 88 | MHACG024-04 | 04-SRNP-2138  | 2004 | Eumorpha fasciatus     | Janzen D.H. - U.P.  |
| 89 | MHACG056-04 | 04-SRNP-22910 | 2004 | Pachylia syces         | Janzen D.H. - U.P.  |
| 90 | MHACG064-04 | 04-SRNP-22911 | 2004 | Pachylia syces         | Janzen D.H. - U.P.  |
| 91 | MHACG072-04 | 04-SRNP-33098 | 2004 | Xylophanes guianensis  | Janzen D.H. - U.P.  |
| 92 | MHACG080-04 | 04-SRNP-31296 | 2004 | Cocytius lucifer       | Janzen D.H. - U.P.  |
| 93 | XAA888-04   | 04-SRNP-2481  | 2004 | Manduca hannibal       | Janzen D.H. - U.P.  |
| 94 | XAA911-04   | 04-SRNP-1909  | 2004 | Xylophanes zurcheri    | Janzen D.H. - U.P.  |
| 95 | XAA919-04   | 04-SRNP-2147  | 2004 | Xylophanes chiron      | Janzen D.H. - U.P.  |
| 96 | Blank6      |               |      |                        |                     |

## Archival Moth Plate

|   | Process ID  | Specimen Voucher ID | Collection Year | Identification      | Source             |
|---|-------------|---------------------|-----------------|---------------------|--------------------|
| 1 | MHACG001-04 | 03-SRNP-23540       | 2003            | Eumorpha triangulum | Janzen D.H. - U.P. |
| 2 | MHACG002-04 | 03-SRNP-5921        | 2003            | Cocytius lucifer    | Janzen D.H. - U.P. |
| 3 | MHACG003-04 | 03-SRNP-8401        | 2003            | Cocytius duponchel  | Janzen D.H. - U.P. |
| 4 | MHACG009-04 | 03-SRNP-23544       | 2003            | Eumorpha triangulum | Janzen D.H. - U.P. |
| 5 | MHACG010-04 | 03-SRNP-16922       | 2003            | Cocytius lucifer    | Janzen D.H. - U.P. |
| 6 | MHACG017-04 | 03-SRNP-23543       | 2003            | Eumorpha triangulum | Janzen D.H. - U.P. |
| 7 | MHACG025-04 | 03-SRNP-23545       | 2003            | Eumorpha triangulum | Janzen D.H. - U.P. |
| 8 | MHACG033-04 | 03-SRNP-23787       | 2003            | Erinnyis ello       | Janzen D.H. - U.P. |
| 9 | MHACG062-04 | 03-SRNP-23551       | 2003            | Eumorpha triangulum | Janzen D.H. - U.P. |

|    |               |               |      |                       |                     |
|----|---------------|---------------|------|-----------------------|---------------------|
| 10 | MHACG070-04   | 03-SRNP-23760 | 2003 | Eumorpha triangulum   | Janzen D.H. - U.P.  |
| 11 | MHACG074-04   | 03-SRNP-23542 | 2003 | Eumorpha triangulum   | Janzen D.H. - U.P.  |
| 12 | MHACG082-04*  | 03-SRNP-23806 | 2003 | Eumorpha triangulum   | Janzen D.H. - U.P.  |
| 13 | MHACG131-04   | 03-SRNP-10100 | 2003 | Eumorpha anchemola    | Janzen D.H. - U.P.  |
| 14 | MHACG139-04   | 03-SRNP-10312 | 2003 | Eumorpha anchemola    | Janzen D.H. - U.P.  |
| 15 | MHACG163-04   | 03-SRNP-10313 | 2003 | Eumorpha anchemola    | Janzen D.H. - U.P.  |
| 16 | Blank1        |               |      |                       |                     |
| 17 | MHASC051-05   | 01-SRNP-11808 | 2001 | Xylophanes libya      | Janzen D.H. - U.P.  |
| 18 | MHASC056-05   | 01-SRNP-11436 | 2001 | Xylophanes libya      | Janzen D.H. - U.P.  |
| 19 | MHASC057-05   | 01-SRNP-10540 | 2001 | Xylophanes libya      | Janzen D.H. - U.P.  |
| 20 | MHASC068-05   | 01-SRNP-9831  | 2001 | Xylophanes pluto      | Janzen D.H. - U.P.  |
| 21 | MHASC069-05   | 01-SRNP-1136  | 2001 | Xylophanes zurcheri   | Janzen D.H. - U.P.  |
| 22 | MHACG081-04   | 01-SRNP-25117 | 2001 | Cocytius antaeus      | Janzen D.H. - U.P.  |
| 23 | MHACG060-04   | 01-SRNP-11692 | 2001 | Cocytius duponchel    | Janzen D.H. - U.P.  |
| 24 | MHACG015-04   | 01-SRNP-10483 | 2001 | Eumorpha megaeacus    | Janzen D.H. - U.P.  |
| 25 | MHACG079-04   | 01-SRNP-3718  | 2001 | Eumorpha megaeacus    | Janzen D.H. - U.P.  |
| 26 | MHACG071-04   | 01-SRNP-22175 | 2001 | Eumorpha megaeacus    | Janzen D.H. - U.P.  |
| 27 | MHACG087-04   | 01-SRNP-3719  | 2001 | Eumorpha megaeacus    | Janzen D.H. - U.P.  |
| 28 | MHACG180-04*  | 01-SRNP-10480 | 2001 | Eumorpha fasciatus    | Janzen D.H. - U.P.  |
| 29 | MHACG123-04   | 01-SRNP-21086 | 2001 | Eumorpha anchemola    | Janzen D.H. - U.P.  |
| 30 | MHACG395-04   | 01-SRNP-4561  | 2001 | Neococytius cluentius | Janzen D.H. - U.P.  |
| 31 | MHACG496-04   | 01-SRNP-14689 | 2001 | Pachylia syces        | Janzen D.H. - U.P.  |
| 32 | Blank2        |               |      |                       |                     |
| 33 | MHASC063-05   | 97-SRNP-2411  | 1997 | Xylophanes libya      | Janzen D.H. - U.P.  |
| 34 | JSPC299-03    | 97-SRNP-1511  | 1997 | Xylophanes chiron     | Janzen D.H. - U.P.  |
| 35 | JSPC310-03    | 97-SRNP-1872  | 1997 | Xylophanes cyrene     | Janzen D.H. - U.P.  |
| 36 | JSPC370-03*   | 97-SRNP-2400  | 1997 | Xylophanes tersa      | Janzen D.H. - U.P.  |
| 37 | JSPC599-03    | 97-SRNP-1122  | 1997 | Xylophanes anubus     | Janzen D.H. - U.P.  |
| 38 | JSPC601-03    | 97-SRNP-1879  | 1997 | Xylophanes cyrene     | Janzen D.H. - U.P.  |
| 39 | JSPC677-03    | 97-SRNP-1538  | 1997 | Adhemarius ypsilon    | Janzen D.H. - U.P.  |
| 40 | MHACG183-04   | 97-SRNP-4422  | 1997 | Eumorpha vitis        | Janzen D.H. - U.P.  |
| 41 | JSPC678-03    | 97-SRNP-4724  | 1997 | Adhemarius ypsilon    | Janzen D.H. - U.P.  |
| 42 | MHACG075-04   | 97-SRNP-1630  | 1997 | Cocytius lucifer      | Janzen D.H. - U.P.  |
| 43 | MHACG036-04   | 97-SRNP-4293  | 1997 | Cocytius duponchel    | Janzen D.H. - U.P.  |
| 44 | MHACG006-04   | 97-SRNP-9832  | 1997 | Cocytius antaeus      | Janzen D.H. - U.P.  |
| 45 | MHACG188-04   | 97-SRNP-9753  | 1997 | Eumorpha fasciatus    | Janzen D.H. - U.P.  |
| 46 | MHACG107-04   | 97-SRNP-9831  | 1997 | Eumorpha fasciatus    | Janzen D.H. - U.P.  |
| 47 | MHACG099-04   | 97-SRNP-9752  | 1997 | Eumorpha fasciatus    | Janzen D.H. - U.P.  |
| 48 | Blank3        |               |      |                       |                     |
| 49 | MHASC088-05   | 89-SRNP-545   | 1989 | Eumorpha satellitia   | Janzen D.H. - U.P.  |
| 50 | MHASC089-05   | 89-SRNP-380   | 1989 | Eumorpha satellitia   | Janzen D.H. - U.P.  |
| 51 | MHASC092-05   | 89-SRNP-827   | 1989 | Eumorpha satellitia   | Janzen D.H. - U.P.  |
| 52 | MHACG157-04   | 89-SRNP-163C  | 1989 | Eumorpha satellitia   | Janzen D.H. - U.P.  |
| 53 | MHACG134-04   | 89-SRNP-304   | 1989 | Erinnyis oenotrus     | Janzen D.H. - U.P.  |
| 54 | MHACG165-04   | 89-SRNP-658   | 1989 | Eumorpha satellitia   | Janzen D.H. - U.P.  |
| 55 | MHACG149-04   | 89-SRNP-528   | 1989 | Eumorpha satellitia   | Janzen D.H. - U.P.  |
| 56 | MHACG141-04   | 89-SRNP-339   | 1989 | Eumorpha satellitia   | Janzen D.H. - U.P.  |
| 57 | MHACG329-04   | 89-SRNP-192   | 1989 | Pachylioides resumens | Janzen D.H. - U.P.  |
| 58 | MHACG337-04   | 89-SRNP-191   | 1989 | Pachylioides resumens | Janzen D.H. - U.P.  |
| 59 | MHACG488-04   | 89-SRNP-345   | 1989 | Pachylia ficus        | Janzen D.H. - U.P.  |
| 60 | JSPC165-03*   | 89-SRNP-501   | 1989 | Manduca florestan     | Janzen D.H. - U.P.  |
| 61 | MHACG102-04   | 88-SRNP-63    | 1988 | Erinnyis oenotrus     | Janzen D.H. - U.P.  |
| 62 | MHACG132-04   | 88-SRNP-101   | 1988 | Erinnyis crameri      | Janzen D.H. - U.P.  |
| 63 | MHACG124-04   | 88-SRNP-89    | 1988 | Erinnyis crameri      | Janzen D.H. - U.P.  |
| 64 | Blank4        |               |      |                       |                     |
| 65 | PHPNG1974-1   | PHPNG1974-1   | 1974 | Sphingidae sp. 1      | Hebert P.D.N.- U.G. |
| 66 | PHPNG1974-2   | PHPNG1974-2   | 1974 | Sphingidae sp. 1      | Hebert P.D.N.- U.G. |
| 67 | PHPNG1974-3   | PHPNG1974-3   | 1974 | Sphingidae sp. 1      | Hebert P.D.N.- U.G. |
| 68 | PHPNG1974-4   | PHPNG1974-4   | 1974 | Sphingidae sp. 1      | Hebert P.D.N.- U.G. |
| 69 | PHPNG1974-5   | PHPNG1974-5   | 1974 | Sphingidae sp. 2      | Hebert P.D.N.- U.G. |
| 70 | PHPNG1974-6   | PHPNG1974-6   | 1974 | Sphingidae sp. 2      | Hebert P.D.N.- U.G. |
| 71 | PHPNG1974-7   | PHPNG1974-7   | 1974 | Sphingidae sp. 2      | Hebert P.D.N.- U.G. |
| 72 | PHPNG1974-8   | PHPNG1974-8   | 1974 | Sphingidae sp. 3      | Hebert P.D.N.- U.G. |
| 73 | PHPNG1974-9   | PHPNG1974-9   | 1974 | Sphingidae sp. 3      | Hebert P.D.N.- U.G. |
| 74 | PHPNG1974-10  | PHPNG1974-10  | 1974 | Sphingidae sp. 3      | Hebert P.D.N.- U.G. |
| 75 | PHPNG1974-11  | PHPNG1974-11  | 1974 | Sphingidae sp. 3      | Hebert P.D.N.- U.G. |
| 76 | PHPNG1974-12* | PHPNG1974-12  | 1974 | Sphingidae sp. 3      | Hebert P.D.N.- U.G. |
| 77 | PHPNG1974-13  | PHPNG1974-13  | 1974 | Sphingidae sp. 3      | Hebert P.D.N.- U.G. |
| 78 | PHPNG1974-14  | PHPNG1974-14  | 1974 | Sphingidae sp. 3      | Hebert P.D.N.- U.G. |
| 79 | PHPNG1974-15  | PHPNG1974-15  | 1974 | Sphingidae sp. 3      | Hebert P.D.N.- U.G. |

|    |           |        |      |                       |                    |
|----|-----------|--------|------|-----------------------|--------------------|
| 80 | Blank5    |        |      |                       |                    |
| 81 | Miller1   | 196189 | 1932 | Cocytius duponchel    | Miller S.E. - S.I. |
| 82 | Miller2   | 196188 | 1933 | Cocytius duponchel    | Miller S.E. - S.I. |
| 83 | Miller3   | 196187 | 1933 | Cocytius antaeus      | Miller S.E. - S.I. |
| 84 | Miller4   | 196203 | 1932 | Pachylia ficus        | Miller S.E. - S.I. |
| 85 | Miller5   | 196202 | 1932 | Pachylia syces        | Miller S.E. - S.I. |
| 86 | Miller6   | 196205 | 1932 | Pachylia ficus        | Miller S.E. - S.I. |
| 87 | Miller7   | 196201 | 1932 | Pachylia syces        | Miller S.E. - S.I. |
| 88 | Miller197 | 196197 | 1933 | Aleuron chloroptera   | Miller S.E. - S.I. |
| 89 | Miller195 | 196195 | 1932 | Eupyrrhoglossum sagra | Miller S.E. - S.I. |
| 90 | Miller10  | 196196 | 1933 | Aleuron iphis         | Miller S.E. - S.I. |
| 91 | Miller11  | 196193 | 1933 | Enyo ocypte           | Miller S.E. - S.I. |
| 92 | Miller12* | 196192 | 1932 | Enyo ocypte           | Miller S.E. - S.I. |
| 93 | Miller198 | 196198 | 1932 | Aleuron chloroptera   | Miller S.E. - S.I. |
| 94 | Miller16  | 196206 | 1932 | Pachylioides resumens | Miller S.E. - S.I. |
| 95 | Miller17  | 196191 | 1932 | Eumorpha vitis        | Miller S.E. - S.I. |
| 96 | Blank6    |        |      |                       |                    |

## Bird Plate

|    | Process ID  | Voucher ID  | Collection Year | Identification                  | Source                |
|----|-------------|-------------|-----------------|---------------------------------|-----------------------|
| 1  | KKBNA307-05 | UWBM 57128  | 1994            | Poecile gambeli                 | Birks S. - B.M.N.H.C. |
| 2  | KKBNA363-05 | UWBM 69161  | 1996            | Chloroceryle americana          | Birks S. - B.M.N.H.C. |
| 3  | KKBNA351-05 | UWBM 68994  | 1996            | Myiarchus tuberculifer          | Birks S. - B.M.N.H.C. |
| 4  | KKBNA178-05 | USNM 613020 | 1989            | Actitis hypoleucos              | Weight L. - S.I.      |
| 5  | KKBNA421-05 | UWBM 73909  | 2002            | Molothrus aeneus                | Birks S. - B.M.N.H.C. |
| 6  | KKBNA400-05 | UWBM 66147  | 2000            | Dendroica coronata              | Birks S. - B.M.N.H.C. |
| 7  | KKBNA375-05 | UWBM 58525  | 1997            | Sphyrapicus nuchalis            | Birks S. - B.M.N.H.C. |
| 8  | KKBNA294-05 | UWBM 46768  | 1993            | Cinclus mexicanus               | Birks S. - B.M.N.H.C. |
| 9  | KKBNA318-05 | UWBM 54048  | 1995            | Empidonax hammondii             | Birks S. - B.M.N.H.C. |
| 10 | KKBNA364-05 | UWBM 69173  | 1996            | Phalacrocorax brasilianus       | Birks S. - B.M.N.H.C. |
| 11 | KKBNA352-05 | UWBM 68995  | 1996            | Vireo flavoviridis              | Birks S. - B.M.N.H.C. |
| 12 | KKBNA337-05 | UWBM 55986  | 1996            | Sporophila torqueola            | Birks S. - B.M.N.H.C. |
| 13 | KKBNA422-05 | UWBM 73910  | 2002            | Molothrus aeneus                | Birks S. - B.M.N.H.C. |
| 14 | KKBNA401-05 | UWBM 66154  | 2000            | Poecile gambeli                 | Birks S. - B.M.N.H.C. |
| 15 | KKBNA179-05 | USNM 621130 | 1996            | Aeronautes saxatalis            | Weight L. - S.I.      |
| 16 | Blank1      |             |                 |                                 |                       |
| 17 | KKBNA295-05 | UWBM 46758  | 1993            | Cinclus mexicanus               | Birks S. - B.M.N.H.C. |
| 18 | KKBNA181-05 | PSM 21816   | 1991            | Anous stolidus                  | Weight L. - S.I.      |
| 19 | KKBNA365-05 | UWBM 69181  | 1996            | Ceryle torquata                 | Birks S. - B.M.N.H.C. |
| 20 | KKBNA353-05 | UWBM 69009  | 1996            | Contopus sordidulus             | Birks S. - B.M.N.H.C. |
| 21 | KKBNA338-05 | UWBM 69977  | 1996            | Protonotaria citrea             | Birks S. - B.M.N.H.C. |
| 22 | KKBNA180-05 | USNM 586114 | 1996            | Anas cyanoptera                 | Weight L. - S.I.      |
| 23 | KKBNA402-05 | UWBM 66155  | 2000            | Poecile gambeli                 | Birks S. - B.M.N.H.C. |
| 24 | KKBNA377-05 | UWBM 72507  | 1997            | Fulica americana                | Birks S. - B.M.N.H.C. |
| 25 | KKBNA308-05 | UWBM 49891  | 1994            | Geothlypis trichas              | Birks S. - B.M.N.H.C. |
| 26 | KKBNA183-05 | USNM 621306 | 1991            | Campylorhynchus brunneicapillus | Weight L. - S.I.      |
| 27 | KKBNA366-05 | UWBM 69185  | 1996            | Ceryle torquata                 | Birks S. - B.M.N.H.C. |
| 28 | KKBNA354-05 | UWBM 69017  | 1996            | Columbina inca                  | Birks S. - B.M.N.H.C. |
| 29 | KKBNA182-05 | USNM 620711 | 1994            | Calonectris diomedea            | Weight L. - S.I.      |
| 30 | KKBNA339-05 | UWBM 69981  | 1996            | Dendroica graciae               | Birks S. - B.M.N.H.C. |
| 31 | KKBNA372-05 | UWBM 68293  | n/a             | Somateria fischeri              | Birks S. - B.M.N.H.C. |
| 32 | Blank2      |             |                 |                                 |                       |
| 33 | KKBNA378-05 | UWBM 58109  | 1997            | Megascops kennicottii           | Birks S. - B.M.N.H.C. |
| 34 | KKBNA309-05 | UWBM 49908  | 1994            | Dendroica occidentalis          | Birks S. - B.M.N.H.C. |
| 35 | KKBNA321-05 | UWBM 54091  | 1995            | Euphagus cyanocephalus          | Birks S. - B.M.N.H.C. |
| 36 | KKBNA367-05 | UWBM 69439  | 1996            | Protonotaria citrea             | Birks S. - B.M.N.H.C. |
| 37 | KKBNA355-05 | UWBM 69277  | 1996            | Campostoma imberbe              | Birks S. - B.M.N.H.C. |
| 38 | KKBNA273-05 | UWBM 43871  | 1992            | Lagopus mutus                   | Birks S. - B.M.N.H.C. |
| 39 | KKBNA427-05 | UWBM 76086  | 2003            | Sitta pygmaea                   | Birks S. - B.M.N.H.C. |
| 40 | KKBNA373-05 | UWBM 68294  | n/a             | Somateria fischeri              | Birks S. - B.M.N.H.C. |
| 41 | KKBNA184-05 | USNM 623291 | 1995            | Cephus grylle                   | Weight L. - S.I.      |
| 42 | KKBNA317-05 | UWBM 51070  | 1994            | Motacilla alba                  | Birks S. - B.M.N.H.C. |
| 43 | KKBNA322-05 | UWBM 54092  | 1995            | Euphagus cyanocephalus          | Birks S. - B.M.N.H.C. |
| 44 | KKBNA368-05 | UWBM 69194  | 1996            | Protonotaria citrea             | Birks S. - B.M.N.H.C. |
| 45 | KKBNA356-05 | UWBM 69034  | 1996            | Myiarchus tuberculifer          | Birks S. - B.M.N.H.C. |
| 46 | KKBNA340-05 | UWBM 56045  | 1996            | Quiscalus mexicanus             | Birks S. - B.M.N.H.C. |

|    |             |             |      |                             |                       |
|----|-------------|-------------|------|-----------------------------|-----------------------|
| 47 | KKBNA425-05 | UWBM 76075  | 2001 | Polioptila melanura         | Birks S. - B.M.N.H.C. |
| 48 | Blank3      |             |      |                             |                       |
| 49 | KKBNA374-05 | UWBM 68295  | n/a  | Somateria fischeri          | Birks S. - B.M.N.H.C. |
| 50 | KKBNA387-05 | UWBM 64438  | 1999 | Stellula calliope           | Birks S. - B.M.N.H.C. |
| 51 | KKBNA329-05 | UWBM 53466  | 1995 | Empidonax difficilis        | Birks S. - B.M.N.H.C. |
| 52 | KKBNA323-05 | UWBM 53997  | 1995 | Poecile rufescens           | Birks S. - B.M.N.H.C. |
| 53 | KKBNA369-05 | UWBM 69443  | 1996 | Camptostoma imberbe         | Birks S. - B.M.N.H.C. |
| 54 | KKBNA357-05 | UWBM 69287  | 1996 | Vireo flavoviridis          | Birks S. - B.M.N.H.C. |
| 55 | KKBNA341-05 | UWBM 56079  | 1996 | Chloroceryle americana      | Birks S. - B.M.N.H.C. |
| 56 | KKBNA186-05 | NRM 946516  | 2001 | Charadrius morinellus       | Weight L. - S.I.      |
| 57 | KKBNA185-05 | USNM 600036 | 1988 | Chamaea fasciata            | Weight L. - S.I.      |
| 58 | KKBNA388-05 | UWBM 64439  | 1999 | Stellula calliope           | Birks S. - B.M.N.H.C. |
| 59 | KKBNA330-05 | UWBM 54879  | 1995 | Synthliboramphus hypoleucus | Birks S. - B.M.N.H.C. |
| 60 | KKBNA324-05 | UWBM 53998  | 1995 | Poecile rufescens           | Birks S. - B.M.N.H.C. |
| 61 | KKBNA187-05 | USNM 609133 | 2001 | Chloroceryle americana      | Weight L. - S.I.      |
| 62 | KKBNA358-05 | UWBM 69314  | 1996 | Tyrannus melancholicus      | Birks S. - B.M.N.H.C. |
| 63 | KKBNA342-05 | UWBM 56092  | 1996 | Myiodynastes luteiventris   | Birks S. - B.M.N.H.C. |
| 64 | Blank4      |             |      |                             |                       |
| 65 | KKBNA243-05 | UWBM 48399  | 1998 | Molothrus aeneus            | Birks S. - B.M.N.H.C. |
| 66 | KKBNA393-05 | UWBM 68190  | 2000 | Thryomanes bewickii         | Birks S. - B.M.N.H.C. |
| 67 | KKBNA383-05 | UWBM 65261  | 1997 | Columbina passerina         | Birks S. - B.M.N.H.C. |
| 68 | KKBNA333-05 | UWBM 57001  | 1995 | Gavia adamsii               | Birks S. - B.M.N.H.C. |
| 69 | KKBNA325-05 | UWBM 53832  | 1995 | Dendroica townsendi         | Birks S. - B.M.N.H.C. |
| 70 | KKBNA371-05 | UWBM 69205  | 1996 | Columbina inca              | Birks S. - B.M.N.H.C. |
| 71 | KKBNA359-05 | UWBM 69066  | 1996 | Chloroceryle americana      | Birks S. - B.M.N.H.C. |
| 72 | KKBNA343-05 | UWBM 56153  | 1996 | Quiscalus mexicanus         | Birks S. - B.M.N.H.C. |
| 73 | KKBNA244-05 | UWBM 72455  | 1988 | Quiscalus mexicanus         | Birks S. - B.M.N.H.C. |
| 74 | KKBNA416-05 | UWBM 68270  | 2001 | Chaetura vauxi              | Birks S. - B.M.N.H.C. |
| 75 | KKBNA188-05 | USNM 630613 | 1994 | Cinclus mexicanus           | Weight L. - S.I.      |
| 76 | KKBNA334-05 | UWBM 57002  | 1995 | Gavia adamsii               | Birks S. - B.M.N.H.C. |
| 77 | KKBNA326-05 | UWBM 53834  | 1995 | Dendroica townsendi         | Birks S. - B.M.N.H.C. |
| 78 | KKBNA304-05 | UWBM 51054  | 1994 | Salpinctes obsoletus        | Birks S. - B.M.N.H.C. |
| 79 | KKBNA360-05 | UWBM 69076  | 1996 | Columbina inca              | Birks S. - B.M.N.H.C. |
| 80 | Blank5      |             |      |                             |                       |
| 81 | KKBNA344-05 | UWBM 56191  | 1996 | Columbina passerina         | Birks S. - B.M.N.H.C. |
| 82 | KKBNA245-05 | UWBM 72456  | 1988 | Quiscalus mexicanus         | Birks S. - B.M.N.H.C. |
| 83 | KKBNA417-05 | UWBM 68269  | 2001 | Chaetura vauxi              | Birks S. - B.M.N.H.C. |
| 84 | KKBNA189-05 | USNM 627152 | 1994 | Coccyzus minor              | Weight L. - S.I.      |
| 85 | KKBNA335-05 | UWBM 57003  | 1995 | Gavia adamsii               | Birks S. - B.M.N.H.C. |
| 86 | KKBNA327-05 | UWBM 54000  | 1995 | Passerella iliaca           | Birks S. - B.M.N.H.C. |
| 87 | KKBNA305-05 | UWBM 51058  | 1994 | Picoides albolarvatus       | Birks S. - B.M.N.H.C. |
| 88 | KKBNA361-05 | UWBM 69078  | 1996 | Vireo flavoviridis          | Birks S. - B.M.N.H.C. |
| 89 | KKBNA345-05 | UWBM 56192  | 1996 | Columbina passerina         | Birks S. - B.M.N.H.C. |
| 90 | KKBNA301-05 | UWBM 57374  | 1993 | Passerina versicolor        | Birks S. - B.M.N.H.C. |
| 91 | KKBNA418-05 | UWBM 68268  | 2001 | Sphyrapicus ruber           | Birks S. - B.M.N.H.C. |
| 92 | KKBNA190-05 | USNM 607905 | 2001 | Coereba flaveola            | Weight L. - S.I.      |
| 93 | KKBNA336-05 | UWBM 57004  | 1995 | Gavia adamsii               | Birks S. - B.M.N.H.C. |
| 94 | KKBNA192-05 | USNM 621178 | 1990 | Contopus sordidulus         | Weight L. - S.I.      |
| 95 | KKBNA191-05 | USNM 626354 | 2001 | Columbina passerina         | Weight L. - S.I.      |
| 96 | Blank6      |             |      |                             |                       |

## Fish Plate

|    | Process ID | Voucher ID | Collection Year | Identification          | Source            |
|----|------------|------------|-----------------|-------------------------|-------------------|
| 1  | FOA034-04  | BW-A034    | 1996            | Furgaleus macki         | Ward R.D. - CSIRO |
| 2  | FOA035-04  | BW-A035    | 1998            | Furgaleus macki         | Ward R.D. - CSIRO |
| 3  | FOA039-04  | BW-A039    | n/a             | Galeorhinus galeus      | Ward R.D. - CSIRO |
| 4  | FOA041-04  | BW-A041    | n/a             | Galeorhinus galeus      | Ward R.D. - CSIRO |
| 5  | FOA042-04  | BW-A042    | 1995            | Mustelus antarcticus    | Ward R.D. - CSIRO |
| 6  | FOA043-04  | BW-A043    | 1996            | Mustelus antarcticus    | Ward R.D. - CSIRO |
| 7  | FOA054-04  | BW-A054    | 2001            | Mustelus lenticulatus   | Ward R.D. - CSIRO |
| 8  | FOA055-04  | BW-A055    | 2001            | Mustelus lenticulatus   | Ward R.D. - CSIRO |
| 9  | FOA058-04  | BW-A058    | 1995            | Carcharhinus dussumieri | Ward R.D. - CSIRO |
| 10 | FOA059-04  | BW-A059    | 1995            | Carcharhinus dussumieri | Ward R.D. - CSIRO |
| 11 | FOA065-04  | BW-A065    | 1996            | Carcharhinus sorrah     | Ward R.D. - CSIRO |
| 12 | FOA066-04  | BW-A066    | 1996            | Carcharhinus sorrah     | Ward R.D. - CSIRO |

|    |           |         |      |                               |                   |
|----|-----------|---------|------|-------------------------------|-------------------|
| 13 | FOA073-04 | BW-A073 | 1996 | Prionace glauca               | Ward R.D. - CSIRO |
| 14 | FOA074-04 | BW-A074 | 2000 | Prionace glauca               | Ward R.D. - CSIRO |
| 15 | FOA078-04 | BW-A078 | 1997 | Rhizoprionodon acutus         | Ward R.D. - CSIRO |
| 16 | Blank1    |         |      |                               |                   |
| 17 | FOA079-04 | BW-A079 | 1997 | Rhizoprionodon acutus         | Ward R.D. - CSIRO |
| 18 | FOA219-04 | BW-A219 | 1996 | Himantura uranakoides         | Ward R.D. - CSIRO |
| 19 | FOA220-04 | BW-A220 | 1996 | Himantura uranakoides         | Ward R.D. - CSIRO |
| 20 | FOA247-04 | BW-A247 | 1994 | Urolophus cruciatus           | Ward R.D. - CSIRO |
| 21 | FOA249-04 | BW-A249 | 1994 | Urolophus cruciatus           | Ward R.D. - CSIRO |
| 22 | FOA257-04 | BW-A257 | 1997 | Urolophus westraliensis       | Ward R.D. - CSIRO |
| 23 | FOA259-04 | BW-A259 | 1997 | Urolophus westraliensis       | Ward R.D. - CSIRO |
| 24 | FOA266-04 | BW-A266 | 1994 | Myliobatis australis          | Ward R.D. - CSIRO |
| 25 | FOA267-04 | BW-A267 | 1994 | Myliobatis australis          | Ward R.D. - CSIRO |
| 26 | FOA306-04 | BW-A306 | 1996 | Gephyroberyx darwinii         | Ward R.D. - CSIRO |
| 27 | FOA307-04 | BW-A307 | 1995 | Gephyroberyx darwinii         | Ward R.D. - CSIRO |
| 28 | FOA310-04 | BW-A310 | 1998 | Hoplostethus gigas            | Ward R.D. - CSIRO |
| 29 | FOA311-04 | BW-A311 | 1998 | Hoplostethus gigas            | Ward R.D. - CSIRO |
| 30 | FOA315-04 | BW-A315 | n/a  | Hoplostethus latus            | Ward R.D. - CSIRO |
| 31 | FOA317-04 | BW-A317 | n/a  | Hoplostethus latus            | Ward R.D. - CSIRO |
| 32 | Blank2    |         |      |                               |                   |
| 33 | FOA331-04 | BW-A331 | 1994 | Neocyttus rhomboidalis        | Ward R.D. - CSIRO |
| 34 | FOA332-04 | BW-A332 | 1994 | Neocyttus rhomboidalis        | Ward R.D. - CSIRO |
| 35 | FOA338-04 | BW-A338 | 1999 | Pseudocyttus maculatus        | Ward R.D. - CSIRO |
| 36 | FOA339-04 | BW-A339 | 1999 | Pseudocyttus maculatus        | Ward R.D. - CSIRO |
| 37 | FOA423-04 | BW-A423 | n/a  | Neosebastes thetidis          | Ward R.D. - CSIRO |
| 38 | FOA425-04 | BW-A425 | n/a  | Neosebastes thetidis          | Ward R.D. - CSIRO |
| 39 | FOA451-04 | BW-A451 | 1996 | Lepidotrigla mulhalli         | Ward R.D. - CSIRO |
| 40 | FOA453-04 | BW-A453 | 1996 | Lepidotrigla mulhalli         | Ward R.D. - CSIRO |
| 41 | FOA484-04 | BW-A484 | 1995 | Cymbacephalus nematophthalmus | Ward R.D. - CSIRO |
| 42 | FOA485-04 | BW-A485 | 1995 | Cymbacephalus nematophthalmus | Ward R.D. - CSIRO |
| 43 | FOA489-04 | BW-A489 | 1995 | Cymbacephalus parilis         | Ward R.D. - CSIRO |
| 44 | FOA490-04 | BW-A490 | 1997 | Cymbacephalus parilis         | Ward R.D. - CSIRO |
| 45 | FOA493-04 | BW-A493 | 1995 | Platycephalus arenarius       | Ward R.D. - CSIRO |
| 46 | FOA495-04 | BW-A495 | 1995 | Platycephalus arenarius       | Ward R.D. - CSIRO |
| 47 | FOA506-04 | BW-A506 | 1995 | Platycephalus endrachtensis   | Ward R.D. - CSIRO |
| 48 | Blank3    |         |      |                               |                   |
| 49 | FOA507-04 | BW-A507 | 1995 | Platycephalus endrachtensis   | Ward R.D. - CSIRO |
| 50 | FOA547-04 | BW-A547 | 1995 | Macquaria ambigua             | Ward R.D. - CSIRO |
| 51 | FOA548-04 | BW-A548 | 1995 | Macquaria ambigua             | Ward R.D. - CSIRO |
| 52 | FOA552-04 | BW-A552 | 1995 | Macquaria colonorum           | Ward R.D. - CSIRO |
| 53 | FOA553-04 | BW-A553 | 1995 | Macquaria colonorum           | Ward R.D. - CSIRO |
| 54 | FOA561-04 | BW-A561 | 1998 | Maccullochella peelii         | Ward R.D. - CSIRO |
| 55 | FOA562-04 | BW-A562 | 1998 | Maccullochella peelii         | Ward R.D. - CSIRO |
| 56 | FOA573-04 | BW-A573 | n/a  | Cephalopholis miniata         | Ward R.D. - CSIRO |
| 57 | FOA574-04 | BW-A574 | 1999 | Cephalopholis miniata         | Ward R.D. - CSIRO |
| 58 | FOA576-04 | BW-A576 | 1995 | Cephalopholis sonnerati       | Ward R.D. - CSIRO |
| 59 | FOA578-04 | BW-A578 | 1995 | Cephalopholis sonnerati       | Ward R.D. - CSIRO |
| 60 | FOA592-04 | BW-A592 | 1995 | Plectropomus maculatus        | Ward R.D. - CSIRO |
| 61 | FOA593-04 | BW-A593 | 1995 | Plectropomus maculatus        | Ward R.D. - CSIRO |
| 62 | FOA597-04 | BW-A597 | 1994 | Polyprion oxygeneios          | Ward R.D. - CSIRO |
| 63 | FOA598-04 | BW-A598 | 1995 | Polyprion oxygeneios          | Ward R.D. - CSIRO |
| 64 | Blank4    |         |      |                               |                   |
| 65 | FOA602-04 | BW-A602 | 1997 | Cromileptes altivelis         | Ward R.D. - CSIRO |
| 66 | FOA604-04 | BW-A604 | 1998 | Cromileptes altivelis         | Ward R.D. - CSIRO |
| 67 | FOA606-04 | BW-A606 | 1998 | Caprodon longimanus           | Ward R.D. - CSIRO |
| 68 | FOA607-04 | BW-A607 | 1998 | Caprodon longimanus           | Ward R.D. - CSIRO |
| 69 | FOA609-04 | BW-A609 | 1996 | Epinephelus morrhua           | Ward R.D. - CSIRO |
| 70 | FOA610-04 | BW-A610 | 1998 | Epinephelus morrhua           | Ward R.D. - CSIRO |
| 71 | FOA615-04 | BW-A615 | 1994 | Epinephelus multinotatus      | Ward R.D. - CSIRO |
| 72 | FOA617-04 | BW-A617 | 1994 | Epinephelus multinotatus      | Ward R.D. - CSIRO |
| 73 | FOA859-04 | BW-A859 | 1995 | Scomberomorus semifasciatus   | Ward R.D. - CSIRO |
| 74 | FOA860-04 | BW-A860 | 1995 | Scomberomorus semifasciatus   | Ward R.D. - CSIRO |
| 75 | FOA864-04 | BW-A864 | 1996 | Thunnus alalunga              | Ward R.D. - CSIRO |
| 76 | FOA865-04 | BW-A865 | 1996 | Thunnus alalunga              | Ward R.D. - CSIRO |
| 77 | FOA869-04 | BW-A869 | 1996 | Thunnus albacares             | Ward R.D. - CSIRO |
| 78 | FOA870-04 | BW-A870 | 1996 | Thunnus albacares             | Ward R.D. - CSIRO |
| 79 | FOA890-04 | BW-A890 | 1996 | Xiphias gladius               | Ward R.D. - CSIRO |
| 80 | Blank5    |         |      |                               |                   |
| 81 | FOA892-04 | BW-A892 | 1996 | Xiphias gladius               | Ward R.D. - CSIRO |
| 82 | FOA899-04 | BW-A899 | 1996 | Makaira mazara                | Ward R.D. - CSIRO |

|    |           |         |      |                            |                   |
|----|-----------|---------|------|----------------------------|-------------------|
| 83 | FOA900-04 | BW-A900 | n/a  | Makaira mazara             | Ward R.D. - CSIRO |
| 84 | FOA903-04 | BW-A903 | 1996 | Tetrapturus angustirostris | Ward R.D. - CSIRO |
| 85 | FOA904-04 | BW-A904 | 1996 | Tetrapturus angustirostris | Ward R.D. - CSIRO |
| 86 | FOA916-04 | BW-A916 | 1994 | Hyperoglyphe antarctica    | Ward R.D. - CSIRO |
| 87 | FOA917-04 | BW-A917 | 1994 | Hyperoglyphe antarctica    | Ward R.D. - CSIRO |
| 88 | FOA921-04 | BW-A921 | 1999 | Tetragonurus cuvieri       | Ward R.D. - CSIRO |
| 89 | FOA922-04 | BW-A922 | 2000 | Tetragonurus cuvieri       | Ward R.D. - CSIRO |
| 90 | FOA923-04 | BW-A923 | n/a  | Cubiceps squamiceps        | Ward R.D. - CSIRO |
| 91 | FOA924-04 | BW-A924 | n/a  | Cubiceps squamiceps        | Ward R.D. - CSIRO |
| 92 | FOA929-04 | BW-A929 | 1995 | Ariomma indica             | Ward R.D. - CSIRO |
| 93 | FOA930-04 | BW-A930 | 1995 | Ariomma indica             | Ward R.D. - CSIRO |
| 94 | FOA933-04 | BW-A933 | 1996 | Pampus argenteus           | Ward R.D. - CSIRO |
| 95 | FOA934-04 | BW-A934 | 2000 | Pampus argenteus           | Ward R.D. - CSIRO |
| 96 | Blank6    |         |      |                            |                   |

\* Additional negative controls for DNA polymerase evaluation; B.M.N.H.C= Burke Museum of Natural History and Culture; S.I.= Smithsonian Institution; U.G.=University of Guelph; U.P.=University of Pennsylvania; CSIRO=Common wealth Scientific and Industrial Research Organisation.



## **B. DNA ISOLATION**

With the exception of homemade methods, DNA extraction protocols were completed following the manufacturers instructions. Protocols for Silitom and DryRelease (Appendix 2) are listed below.

### ***Silitom DNA extraction***

This protocol is based on the methods of Elphinstone et al. (2003) and Boom et al. (1990) with modifications to accommodate handling of small specimens.

1. A small amount of tissue (2-3 mm<sup>3</sup> or 2-4 mm of insect leg) was added into each well of a 96-well microplate (maximum capacity 250 µl) containing 60 µl of Lysis buffer (100 mM NaCl, 50 mM Tris-HCl, pH 8.0, 10 mM EDTA, pH 8.0, 0.5% SDS and 24 µg proteinase K. The plate was covered with 8-strip caps and incubated overnight at 55°C.
2. The plate was mixed by rotation and centrifuged at 1500 g for 1 min to precipitate cellular debris.
3. The binding buffer (6 M guanidine thiocyanate, 20 mM EDTA pH 8.0, 10 mM Tris-HCl pH 6.4, 4% Triton X-100) was pre-warmed at 55°C and mixed with an equal volume of 95% ethanol, and 120 µl of mix was added to each well. The plate was mixed and centrifuged at 1000 g for 1 min to precipitate cellular debris.
4. To prepare diatomaceous earth, 3 ml of water was added to a 15 ml conical tube. Approximately 1.5 g of diatomaceous earth (Sigma, D3877) was added to a tube and diluted with ddH<sub>2</sub>O to a total volume of 15 ml. The tube was closed and shaken (to make MUD); particles were allowed to settle for 30 min – 3 hours. The upper liquid layer was removed; tube was refilled with ddH<sub>2</sub>O and allowed to settle again for 30 min – 2 hours. After the second settling the liquid layer was aspirated (or poured off) and ddH<sub>2</sub>O equal in volume to semisolid MUD was added to the tube.
5. 10 µl of diatomaceous earth suspension in water (MUD) was added to each well of a filtration plate (Multiscreen MAHVN4550, Millipore, MA, USA) and placed on top of a vacuum manifold.
6. Lysates and binding mix were transferred to the Multiscreen HV filtration plate, mixed with MUD by gentle pipetting and allowed 1 min for binding of DNA to MUD. Vacuum was applied to remove the binding buffer.
7. To remove binding buffer from MUD-DNA complex, 250 µl of ice-cold wash buffer (50% EtOH, 50 mM NaCl, 10 mM Tris-HCl, pH 7.4, 0.5 mM EDTA, pH 8.0) was added to wells. Vacuum was applied to remove the wash buffer.
8. The wash step was repeated two additional times, to ensure all binding buffer was removed.

9. The plate was tapped on a clean Kimwipe to remove residual wash buffer, and placed back on the manifold under vacuum for 10-15 min to further remove residual wash buffer and dry the diatomaceous earth. Alternatively, the plate could be dried in an incubator preheated to 55°C. This drying step is critical to avoid cross contamination between wells during the elution step.

10. The filtration plate was secured on top of a 96-well skirted PCR microplate using a Millipore collar, rubber bands and tape. 50 µl sterile ddH<sub>2</sub>O water prewarmed to 56°C, was added to each well and incubated for 5 min.

11. The plate was centrifuged at 3000 g for 10 min to elute the DNA and was sealed and stored at 4°C.

### **C. PCR CONDITIONS USED IN THE EVALUATION OF DNA ISOLATION METHODS**

Each PCR reaction had a total volume of 12.5 µl and contained 2.0 µl of template DNA, 5% trehalose (D-(+)-Trehalose dehydrate), 1.25 µl of 10x ThermoPol reaction buffer (New England Biolabs, Beverly, MA), 2.5 mM of MgCl<sub>2</sub>, 1.25 pmol each of forward and reverse primer, 50 µM of dNTP, and 0.3125 U of *Taq*DNA polymerase (New England Biolabs, Beverly, MA). The thermocycle profile for moth samples consisted of 94°C for 1 min, five cycles of 94°C for 40 sec, 45°C for 40 sec, and 72°C for 1 min, followed by 35 cycles of 94°C for 40 sec, 51°C for 40 sec, and 72°C for 1 min, with a final extension at 72°C for 5 min. Fish and bird samples were amplified using a thermocycle profile consisting of 94°C for 2 min, 35 cycles of 94°C for 30 sec, 54°C for 30 sec, and 72°C for 1 min, with a final extension at 72°C for 10 min.

### **D. PROTOCOLS FOR DNA POLYMERASE EVALUATION**

Four DNA polymerase enzymes were evaluated using fresh and archived moth DNA isolated using the Nucleospin 96 column tissue kit (Machery Nagel Inc., Easton, PA, USA) (Appendix 2). The manufacturers' suggestions for optimal PCR conditions were followed for each enzyme. The amount of DNA used in each reaction was constant (2.0 µl). PCR product yield for each enzyme was evaluated with three primers sets; LepF/LepR and miniLepF1/LepR (see below). Listed below are brief descriptions of the enzymes and the PCR conditions used for each.

#### ***Taq*DNA Polymerase (New England Biolabs, Beverly, MA, USA)**

Each PCR reaction had a total volume of 25 µl and contained 2.0 µl of DNA, 2.5 µl of 10X ThermoPol reaction buffer, 2.5 mM of MgCl<sub>2</sub>, 2.5 pmol each of forward and reverse primer, 50 µM of dNTP, and 0.625 U of *Taq*DNA polymerase. The thermocycle profile consisted of 94°C, for 2 min followed by 35 cycles 94°C for 40 sec, 51°C for 40 sec, and 72°C for 1 min, with a final extension at 72°C for 5 min.

### ***Restorase DNA Polymerase (Sigma-Aldrich, St. Louis, MO)***

Each PCR contained 2.0 µl of DNA, 2.5 µl of 10X Restorase reaction buffer, 0.2 mM dNTP mix, and 1.25 U of Restorase enzyme. The cycling profile started with a preincubation period of 5 min at 4°C, for DNA repair, 5 sec at 94°C, and a pause at 75 ° (10 pmol of forward and reverse primer were added to the PCR reaction at this step). Thermocycling was resumed for amplification for 30 cycles of 94°C for 5 sec, 51°C for 20 sec, 68°C for 1 min, with a 1 min final extension at 68°C.

### ***AccuTaq LA DNA polymerase mix (Sigma-Aldrich, St. Louis, MO)***

Each PCR had a total volume of 25 µl and contained 2.0 µl of template DNA, 2.5 µl of 10X AccuTaq LA buffer 0.5 mM dNTP mix, 10 pmol of forward and reverse primer, and 1.25 U of AccuTaq DNA polymerase. The thermocycle profile was 30 sec at 98°C, followed by 30 cycles of 94°C for 5 sec, 51°C for 20 sec, 68°C for 1 min, with a 1 min final extension at 68°C.

### ***Diamond DNA Polymerase (Bioline USA Inc., Randolph, MA)***

Each PCR had a total volume of 25 µl and contained 2.0 µl of template DNA, 2.5 µl of 10X NH<sub>4</sub> buffer, 5 mM of MgCl<sub>2</sub>, 2.5 pmol of forward and reverse primer, and 2.5 U of Diamond DNA polymerase. The cycling conditions were 94°C for 1 min, followed by 35 cycles of 94°C for 40 sec, 51°C for 1 min, 72°C for 2 min, followed by a 5 min final extension at 72°C.

## **E. PRIMERS**

Below is a list of primers used for amplification of a fragment of *cox1* gene, located in the 5' region, from moths, birds and fish. For moth samples forward primers were paired with LepR to amplify fragments with different sizes. The size of the PCR product for each primer set is listed.

| Target specimens           | Primer    | Sequence (5' – 3')         | PCR product (bp) | Reference             |
|----------------------------|-----------|----------------------------|------------------|-----------------------|
| <b>Moths (Lepidoptera)</b> | LepR      | TAAACTTCTGGATGTCCAAAAAATCA |                  | Hebert et al. (2004a) |
|                            | LepF      | ATTCAACCAATCATAAAGATATTGG  | 658              | Hebert et al. (2004a) |
|                            | MiniLepF1 | GCTTTCCCACGAATAAATAATA     | 407              | Hebert et al. (2004a) |
|                            | LepF152-2 | ACTATCTTTTGATCRAATACCATTRT | 155              | Ivanova (pers com)    |
| <b>Birds</b>               | BirdF1    | TTCTCCAACCACAAAGACATTGGCAC | 696              | Hebert et al. (2004b) |
|                            | BirdR1    | ACGTGGGAGATAATTCCAAATCCTGG |                  | Hebert et al. (2004b) |
| <b>Fish</b>                | VertF2    | TCAACCAACCACAAAGACATTGGCAC | 655              | Ward et al.(2005)     |
|                            | VertR1    | TAGACTTCTGGGTGGCCAAAGAATCA |                  | Ward et al. (2005)    |

## F. SCREENING PCR PRODUCTS

PCR products were separated on a 2% agarose E-Gel96 gel (Invitrogen, Carlsbad, CA, USA), visualized under UV light and photographed with a AlphaImager 3400 imaging system (Alpha Inotech, San Leandro, CA, USA). Identical camera settings were used for all photographs. Four independent blind counts were performed and the counts were averaged (images are available upon request).

## G. SEQUENCING PROTOCOL

The PCR products from each DNA isolation method and the DNA polymerase evaluation experiments were sequenced. The total volume of the sequencing reaction was 10  $\mu$ l consisting of 1.875  $\mu$ l of 5X sequencing buffer (Applied Biosystems, Foster City, CA, USA), 0.25  $\mu$ l of BigDye terminator v3.1 (Applied Biosystems, Foster City, CA, USA), 5  $\mu$ l of 10 % trehalose and 10 pmol of the primer LepR, BirdR1 and VertR1 for moths, birds and fish samples, respectively. The sequencing cycle had an initial denaturing step of 96°C for 2 min, followed by 30 cycles of 96°C for 30 sec, 55°C for 15 sec, and 60°C for 4 min. The sequencing products were purified following the Sephadex clean-up protocol (Appendix 2) and analyzed on a 3730 DNA Analyzer (Applied Biosystems, Foster City, CA, USA).

## REFERENCES

- Boom, R., Sol, C. J., Salimans, M. M., Jansen, C. L., Wertheim-van Dillen, P. M. & van der Noordaa, J. 1990 Rapid and simple method for purification of nucleic acids. *J Clin Microbiol* **28**, 495-503.
- Elphinstone, M., Hinten, G., Anderson, M. & Nock, C. 2003 An inexpensive and high-throughput procedure to extract and purify total genomic DNA for population studies. *Molecular Ecology Notes* **3**, 317-320.
- Hebert, P. D., Penton, E. H., Burns, J. M., Janzen, D. H. & Hallwachs, W. 2004a Ten species in one: DNA barcoding reveals cryptic species in the neotropical skipper butterfly *Astrartes fulgerator*. *Proc Natl Acad Sci U S A* **101**, 14812-7.
- Hebert, P. D., Stoeckle, M. Y., Zemplak, T. S. & Francis, C. M. 2004b. Identification of Birds through DNA Barcodes. *PLoS Biol* **2**, E312.
- Ward, R., Zemplak, T., Innes, B., Last, P. & Hebert, P. 2005 A start to DNA barcoding Australia's fish species. *Philosophical Transactions of the Royal Society of London B Biological Sciences*.

## **APPENDIX 2.**

### **ROUTINE LABORATORY PROTOCOLS FOR HIGH-VOLUME DNA BARCODING**

#### **A. DNA ISOLATION**

##### *General practices*

Clean the bench top with ethanol before and after setting up extractions. Always use clean, acid or flame sterilized forceps between specimens. For acid sterilization briefly soak forceps and pestles in 5N HCl for 30 sec directly before use. Rinse forceps and pestles in two separate ddH<sub>2</sub>O washes to remove excess HCl. For flame sterilization, soak forceps in 95-100% ethanol and ignite on propane burner for 1-2 seconds. Repeat if necessary.

##### *DryRelease DNA isolation for recent specimens*

This method is based on Chelex/proteinase K isolation and is suitable for recent specimens (less than one year old). For best results, dried specimens such as insect legs should be soaked in 95 % ethanol prior to extraction.

##### **Extraction buffer (100 ml)**

|                                   |              |
|-----------------------------------|--------------|
| Chelex-100 (Bio-Rad laboratories) | 6 g          |
| 1% Sodium Azide                   | 10 ml        |
| 1M Tris-HCl pH 8.3                | 1 ml         |
| Ultrapure H <sub>2</sub> O        | up to 100 ml |

Store at 4°C in 10 ml aliquots.

1. Add 10 µl of proteinase K to 100 µl extraction buffer (for 96 samples, add 1 ml of proteinase K to 10 ml of extraction buffer). Final volume can vary (40-110 µl) to accommodate different sample sizes and should be optimized for each tissue type.
2. Dispense 100 µl DryRelease solution using a multichannel or regular pipette (use wide-bored tips) in each well of a 96-well microplate (maximum capacity 250 µl). Mix solution while dispensing to make sure that the Chelex resin is equally dispersed between wells.
3. Put a small amount of tissue (e.g. 1-2 mm of insect leg or 1-2 mm<sup>3</sup> of ethanol preserved tissue) into each well of the microplate. To prevent cross-contamination, work with one row at a time, closing each row with an 8-strip cap.

4. Incubate at 55°C for 12-24 hours.
5. Tape over the lids and vortex (only for muscle tissue).
6. Centrifuge the microplate at 1000 g for 5 min.
7. Incubate the microplate in a thermocycler at 95°C for 20 min to denature the proteinase K.
8. Store the microplate at -20°C.
9. Prior to adding DNA to a PCR reaction, centrifuge the microplate at 1000 g for 5 min.
10. Use 1-2 µl of DNA sample in a PCR reaction. Use the upper phase of the liquid to prevent Chelex granules from entering the PCR reaction.

### ***NucleoSpin96 Tissue Kit DNA isolation for recent and archived specimens***

NucleoSpin96 Tissue Kit (Machery-Nagel, Düren, Germany) is a silica-based DNA extraction kit and is suitable for the isolation of DNA from recent and archived (more than one year old) specimens. The protocol used is according to manufacturer's instruction with minor modifications:

1. Add a small amount of tissue (e.g. 2-4 mm of insect leg or 2-3 mm<sup>3</sup> of ethanol preserved tissue) to each well of a round-well block supplied with the kit.
2. Prepare a working solution of proteinase K by combining 180 µl of buffer T1 with 25 µl of Proteinase K for each sample. Transfer 200 µl of the working solution into each well of the round-well block.
3. Seal wells with cap strips provided and shake vigorously for 10 – 15 sec to mix.
4. Centrifuge at 1500 g for 15 sec to collect samples at the bottom of the wells.
5. Incubate at 56°C for a minimum of 6 hours or overnight to allow digestion. Tape down cap strips to prevent them from occasionally popping off.
6. Centrifuge at 1500 g for 15 sec to remove any condensate from the cap strips.
7. For each sample, add 200 µl of 95% ethanol and 200 µl of binding buffer BQ1.
8. Shake vigorously for 10 – 15 sec and centrifuge at 1500 g for 10 sec to remove any sample from the cap strips.

9. Remove cap strips and transfer the lysate (about 600  $\mu$ l) from the wells of the round-well block into the wells of the NucleoSpin tissue binding plate placed on top of a square-well block.
10. Seal plate with self-adhering PE foil supplied with kit.
11. Centrifuge at 5600 – 6000 g for 10 min to bind DNA to the silica membrane.
12. First wash step: Add 500  $\mu$ l of buffer BW to each well of the binding plate. Seal with a new self-adhering PE foil and centrifuge at 5600 – 6000 for 2 min.
13. To accommodate the volume of flow through, replace the square-well block with a sterile square-well block.
14. Second wash step: Add 700  $\mu$ l of buffer B5 to each well of the binding plate. Seal with a new self-adhering PE foil and centrifuge at 5600 – 6000 for 4 min.
15. Remove the self-adhering PE foil and place the binding plate on an open rack of MN tube strips. Incubate at 56°C for 30 min (or at 70°C for 10 min) to evaporate residual ethanol.
16. Dispense 30 – 100  $\mu$ l of ddH<sub>2</sub>O (prewarmed to 56°C) directly onto the membrane in each well of the NucleoSpin tissue binding plate and incubate at room temperature for 1 min.
17. To elute DNA, centrifuge at 5600 - 6000 g for 2 min, and centrifuge again at 5600 – 6000 g. Remove the NucleoSpin tissue binding plate and discard. Transfer the eluted DNA to a 96 well microplate and seal.
18. DNA can be temporarily stored at 4°C or at –20°C for long-term storage.
19. Use 1-5  $\mu$ l of the DNA for PCR.

## B. PCR AMPLIFICATION

### *General practices*

The amount of DNA used will depend on the concentration of the sample. It is best to keep the volume of template as low as possible to avoid adding enzyme inhibitors that may be present, and to avoid unspecific amplification of excess DNA. Primers should be tested with positive samples prior to first use and, to prevent degradation, primers should not be stored for a long period of time (i.e. more than one year). The addition of trehalose (D-(+)-Trehalose dehydrate; e.g. 10%) can improve PCR success rate and allows for pre-dispensed 96-well plates of sequencing reaction to be prepared in advance and stored at -20°C for 1-3 months. The use of filter tips is recommended for all PCR reagents to avoid contamination.

### *PCR reaction mix*

Below is the recipe for a typical PCR reaction mix:

| <b>Reagent</b>                   | <b>Volume (µl)</b> |
|----------------------------------|--------------------|
| 10% trehalose                    | 6.25               |
| H <sub>2</sub> O + DNA           | 4                  |
| 10X PCR buffer                   | 1.25               |
| 50 mM MgCl <sub>2</sub> (2.5 mM) | 0.625              |
| 10 mM dNTP                       | 0.0625             |
| 10 µM forward primer             | 0.125              |
| 10 µM reverse primer             | 0.125              |
| Taq polymerase                   | 0.0625             |
| <b>Total</b>                     | <b>12.5</b>        |

### *Thermocycler profile*

For *coxI* amplification, it is ideal to begin the annealing at a low temperature (45°C) for a few initial cycles to allow the primers to bind to the template and then raise the temperature (to 51-55°C; optimized depending on the primers T<sub>m</sub>) to avoid excessive non-specific binding of primers. For example, the typical thermocycle profile for the Lepidoptera primers consists of 94°C for 1 min, five cycles of 94°C for 40 sec, 45°C for 40 sec, and 72°C for 1 min, followed by 35 cycles of 94°C for 40 sec, 51°C for 40 sec, and 72°C for 1 min, with a final extension at 72°C for 5 min. For *coxI* amplification of vertebrate samples we use a thermocycle profile consisting 94°C for 2 min, 35 cycles of 94°C for 30 sec, 54°C for 30 sec, and 72°C for 1 min, with a final extension at 72°C for 10 min.



## C. PCR PRODUCT SCREENING

PCR products are separated on a 2% agarose E-Gel96 gel (Invitrogen, Carlsbad, CA, USA). Since this system is bufferless it minimizes the exposure to hazardous ethidium bromide. However, gloves should be worn when handling and loading the gel. 4-5  $\mu$ l of PCR products are loaded onto the agarose gel with an 8- or 12-multichannel pipettor. The running procedure is straightforward and is done according to the manufacturer's instructions for 6-12 min. The gel is visualized and photographed on a UV transilluminator equipped with digital camera (see the image below). The gel image is aligned and arranged using the E-Editor 2.0 software (Invitrogen, Carlsbad, CA, USA).

A typical E-Gel96 gel image of *cox1* amplification

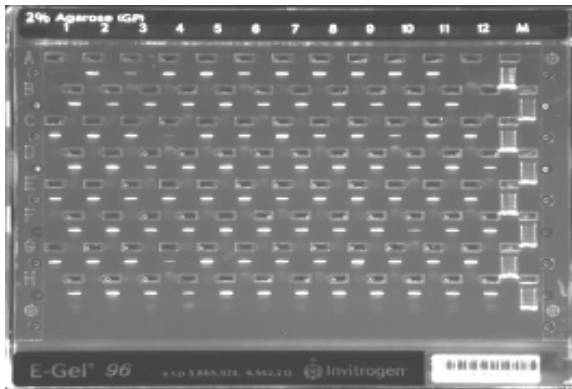

Note: M=DNA size marker; white bands indicate PCR products; clear slots are the loading wells.

## D. SEQUENCING

### *Sequencing reaction*

Sequencing reactions are done using the BigDye (Applied Biosystems, Foster City, CA, USA) cycle sequencing chemistry. Below is the typical sequencing reaction mix based on a 1/16 dilution of the BigDye reagent. The amount of PCR product can be increased up to 2  $\mu$ l (depending on the intensity of the band on an agarose gel).

| <b>Reagent</b>                | <b>Volume (<math>\mu</math>l)</b> |
|-------------------------------|-----------------------------------|
| BigDye v3.1                   | 0.25                              |
| BigDye sequencing buffer (5X) | 1.875                             |
| 10% trehalose                 | 5                                 |
| 10 $\mu$ M primer             | 1                                 |
| ddH <sub>2</sub> O            | 0.875                             |
| PCR product                   | 1                                 |
| <b>Total</b>                  | <b>10</b>                         |

Note: for BigDye sequencing buffer (5X) either use the 5X reaction buffer produced by Applied Biosystems (Foster City, CA, USA) or 400 mM Tris-HCl pH 9.0, 10 mM MgCl<sub>2</sub>.

Sequencing reactions are run in a thermocycler with an initial denaturing step of 96°C for 2 min, followed by 30 cycles of 96°C for 30 sec, 55°C for 15 sec, and 60°C for 4 min. The annealing temperature can be varied according to the primer specificity but 55°C works well for most *coxI* sequencing reactions.

### *Sequencing reaction clean-up*

Sequencing reaction clean-up is done using a Sephadex column method in a MultiScreen-HV filtration plate (Millipore, Billerica, MA, USA) according to the manufacturer's instructions. The entire sequencing reaction is added to Sephadex columns for purification.
